# Supplementary material for: The Biochemical Anatomy of Cortical Inhibitory Synapses
Source: PubMed Central journal article supplement (PMC3387162; doi:10.1371/journal.pone.0039572), 2012-06-29

**FIGURE S2****A GABA<sub>A</sub>Rβ1 peptide 1**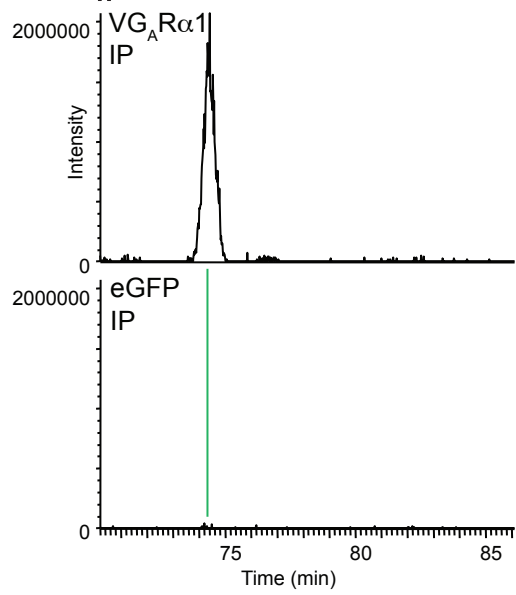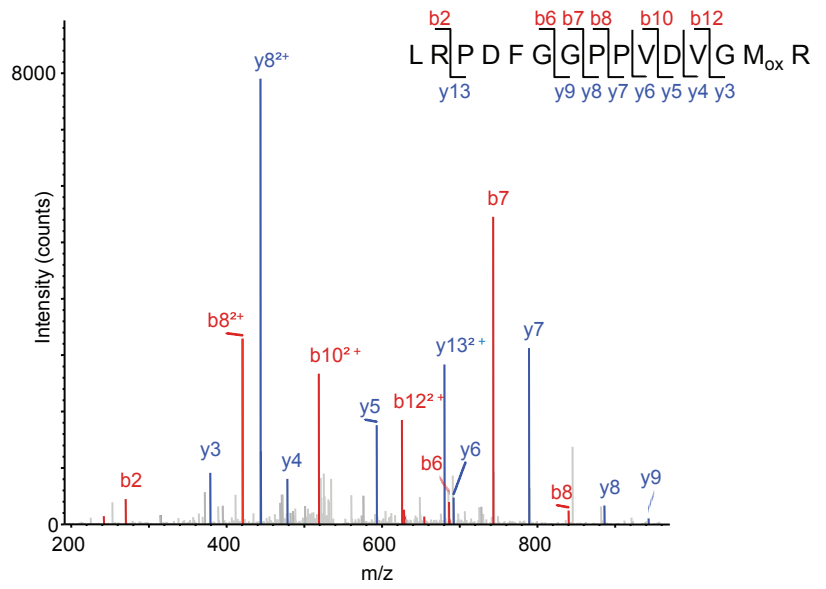**B GABA<sub>A</sub>Rβ3 peptide 12**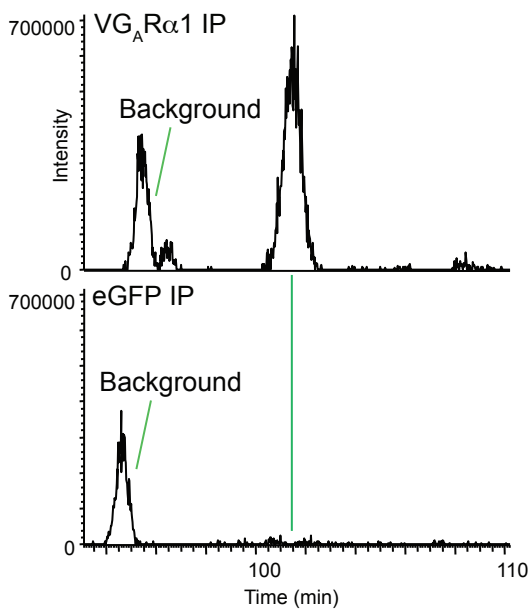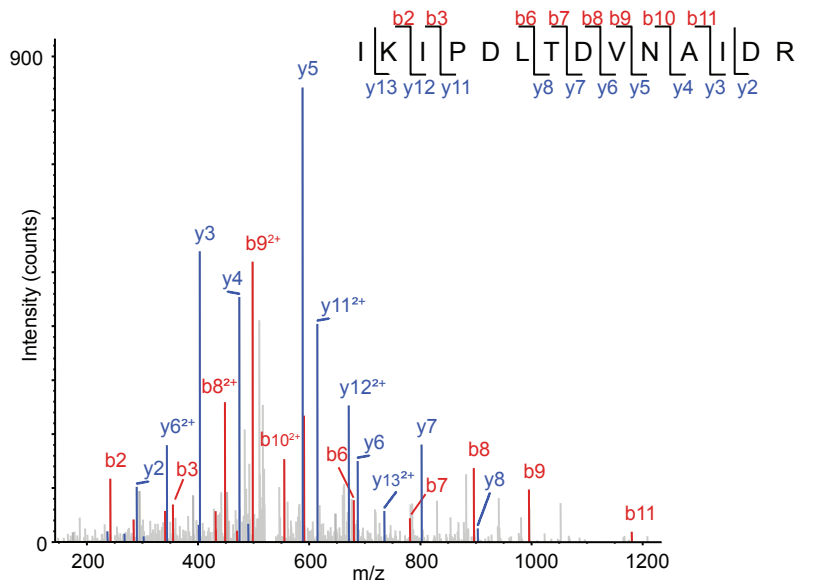**C Neuroigin2 peptide 11**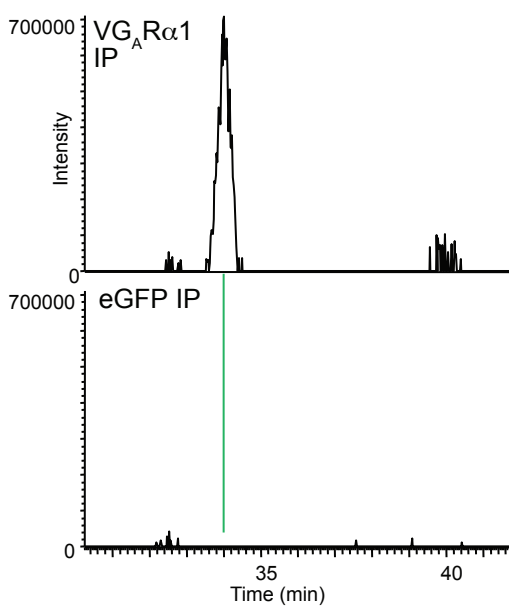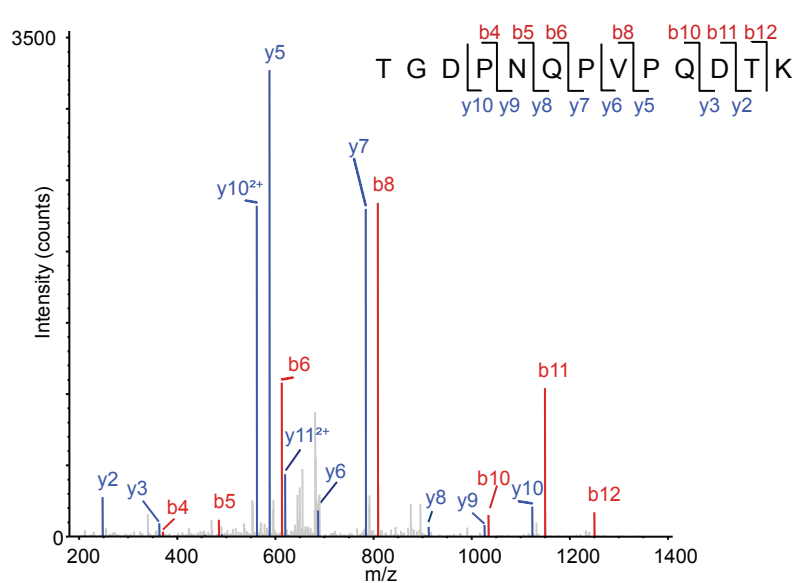

### D GABA<sub>A</sub>R $\alpha$ 1 peptide 9

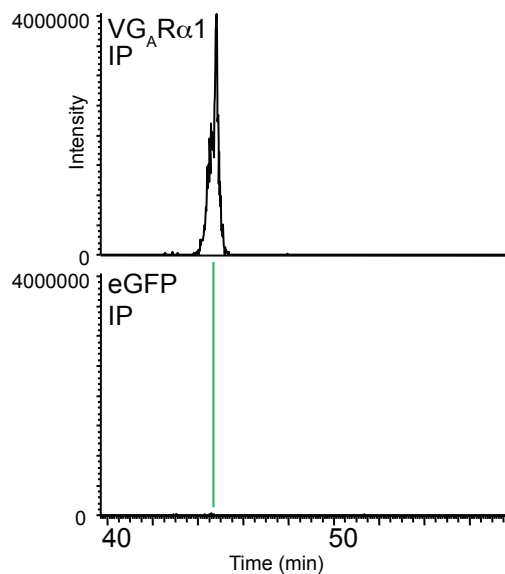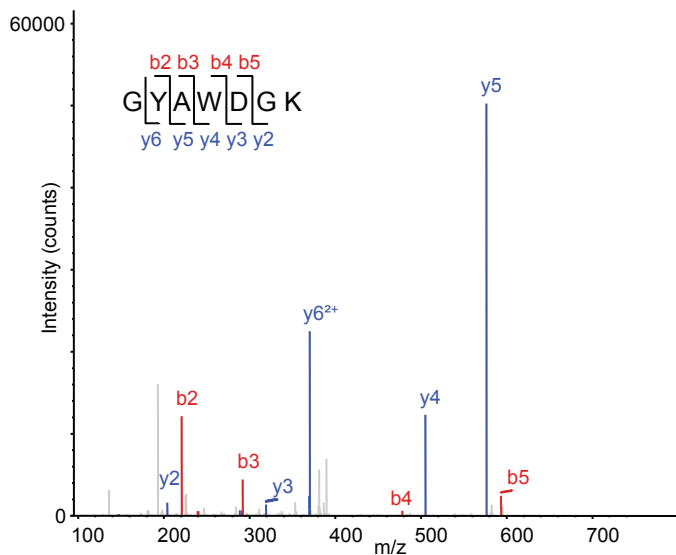

### E Gephyrin peptide 12

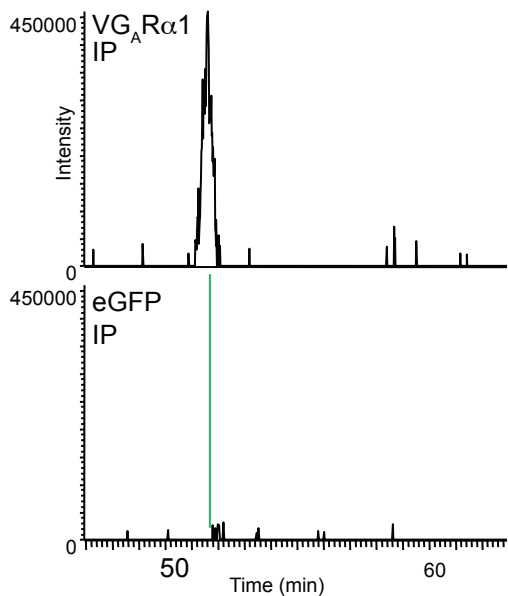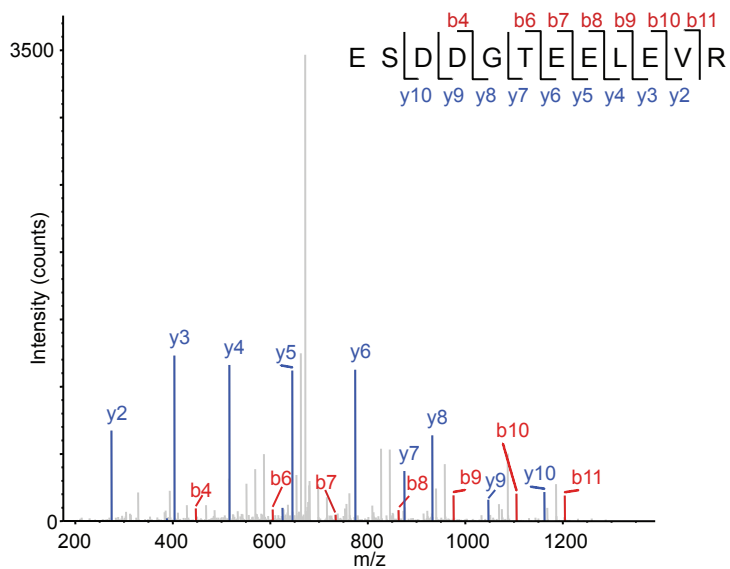

### F GABA<sub>A</sub>R $\gamma$ 2 peptide 10

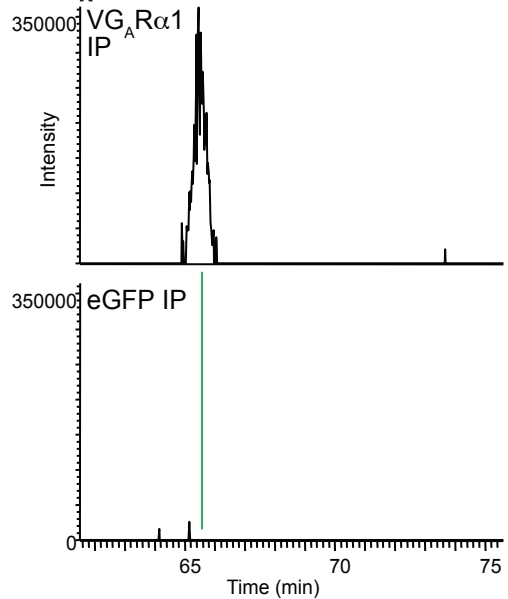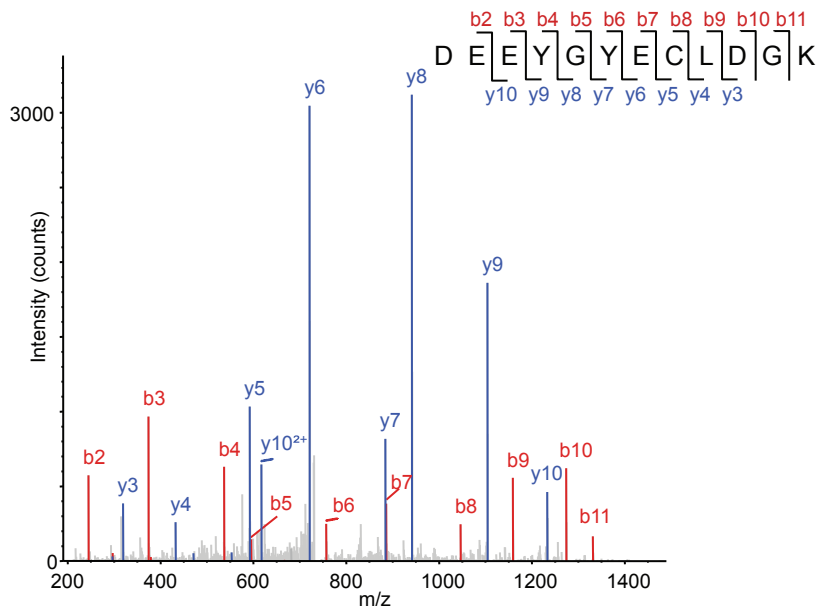

### G GABA<sub>A</sub>R $\alpha$ 3 peptide 1

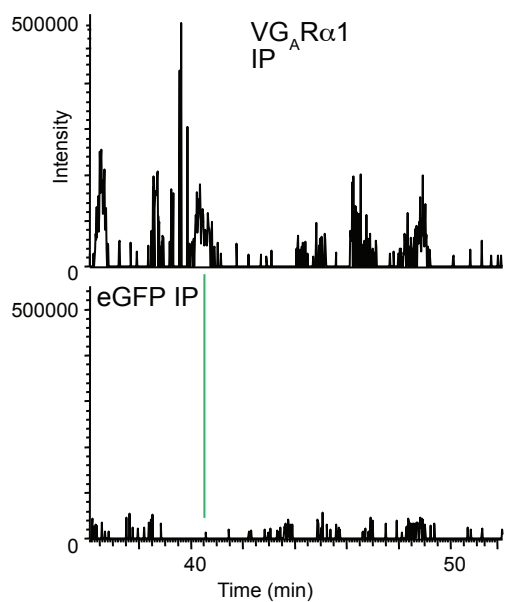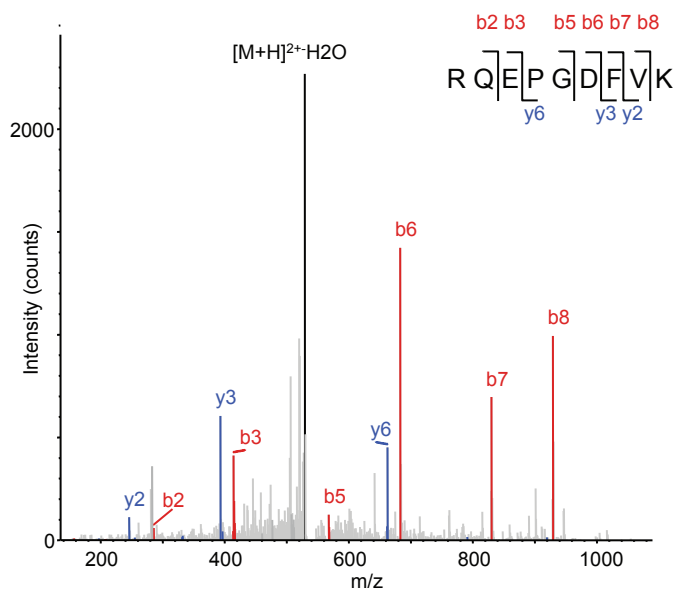

### H Neuroligin3 peptide 5

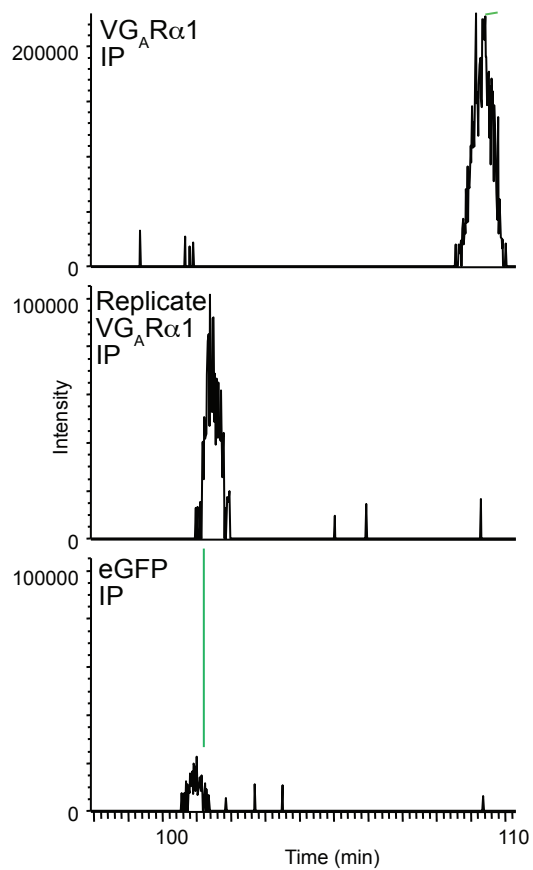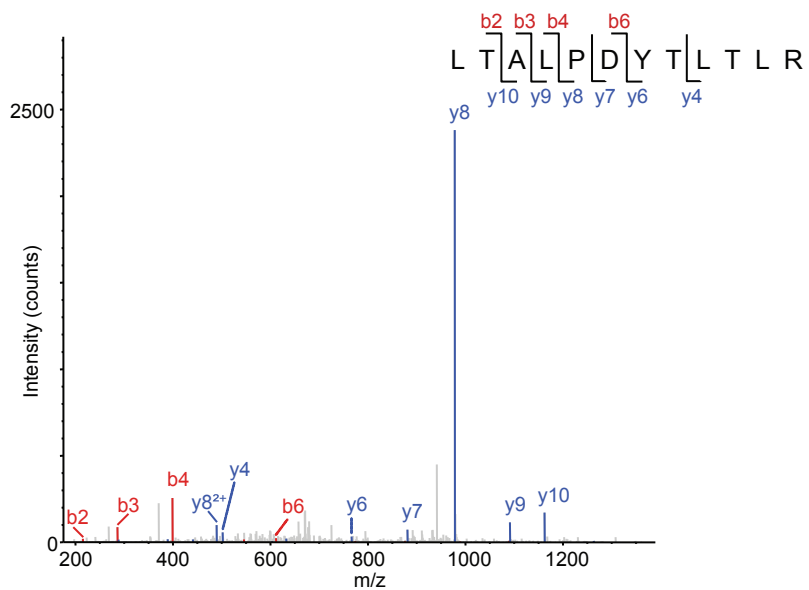

### I Neurobeachin peptide 5

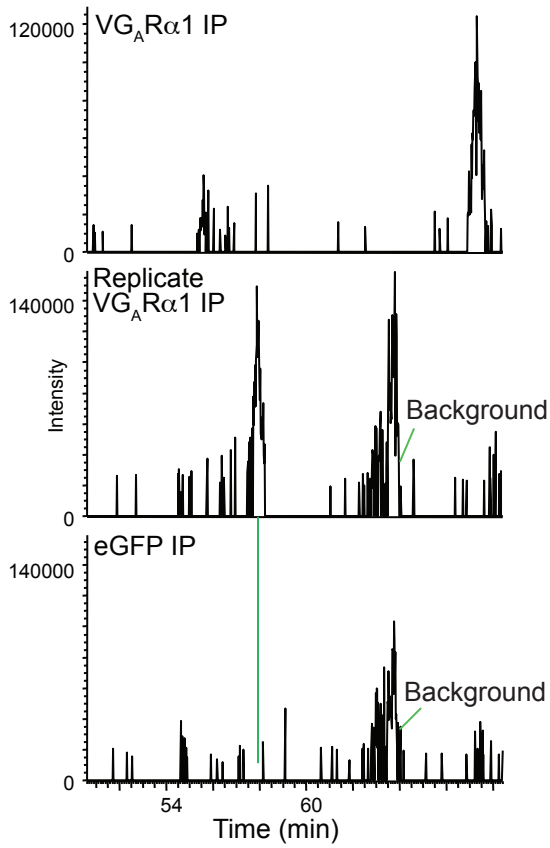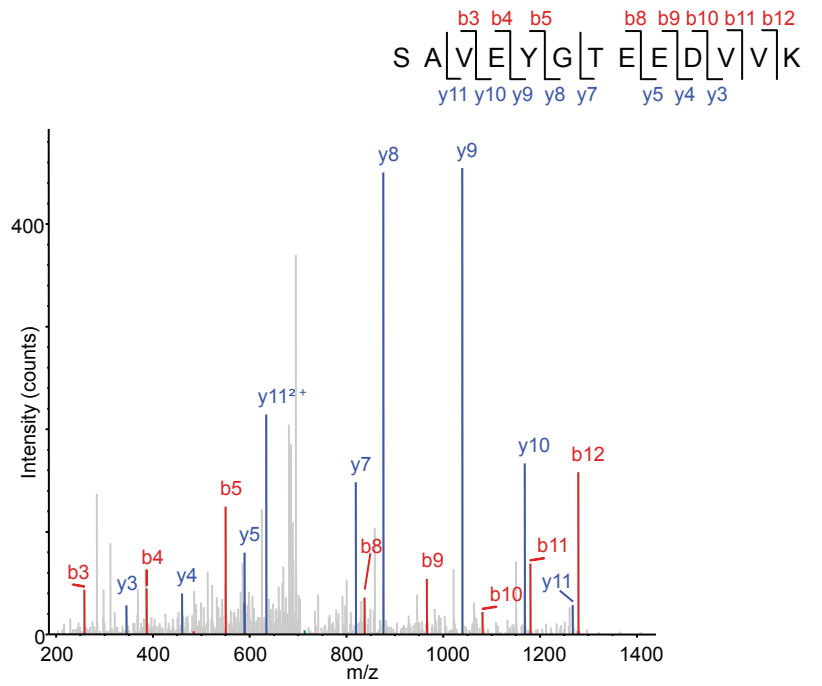

### J GABA<sub>A</sub> Rα2 peptide 4

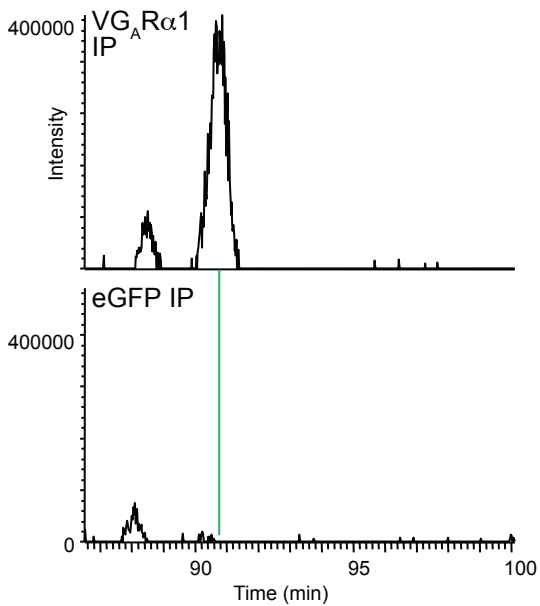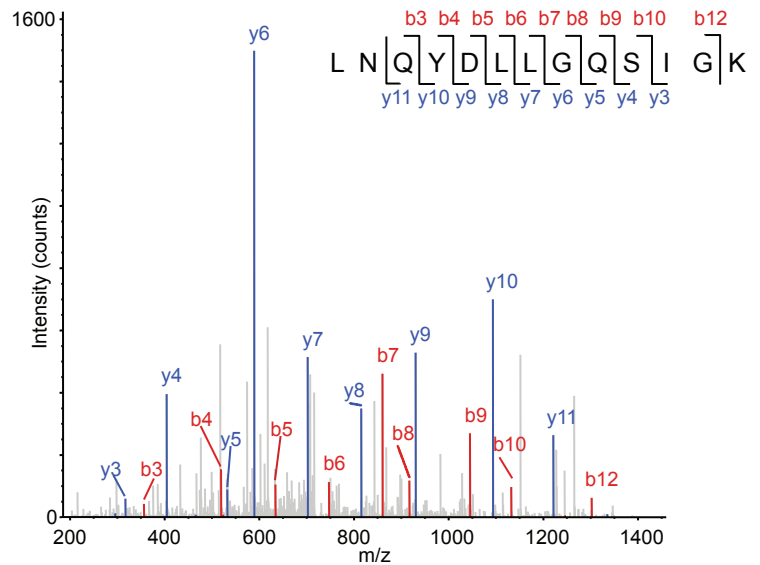

**K GABA<sub>A</sub>R $\alpha$ 4 peptide 1**

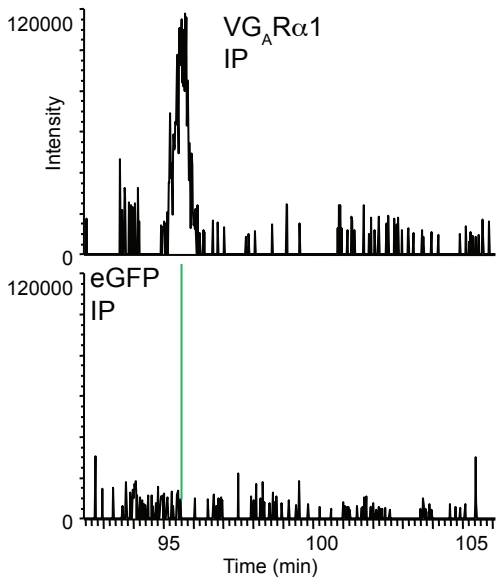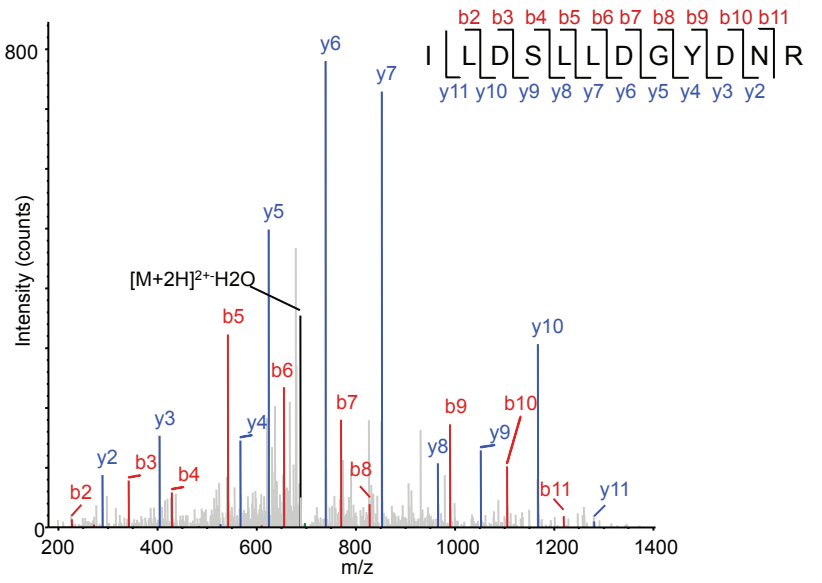

**L GABA<sub>A</sub>R $\alpha$ 5 peptide 1**

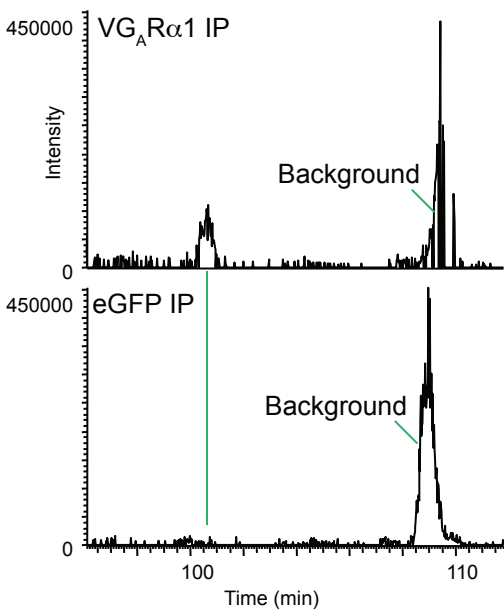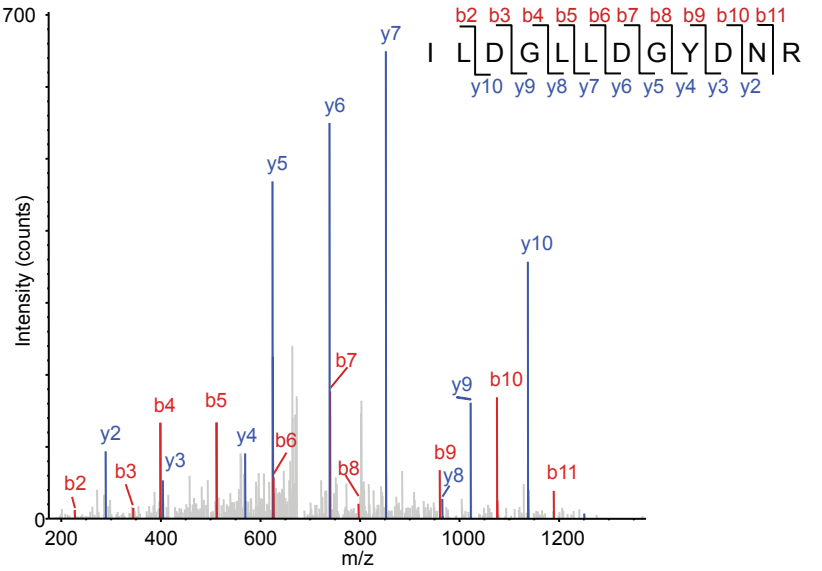

**M Neurexin1 peptide 5**

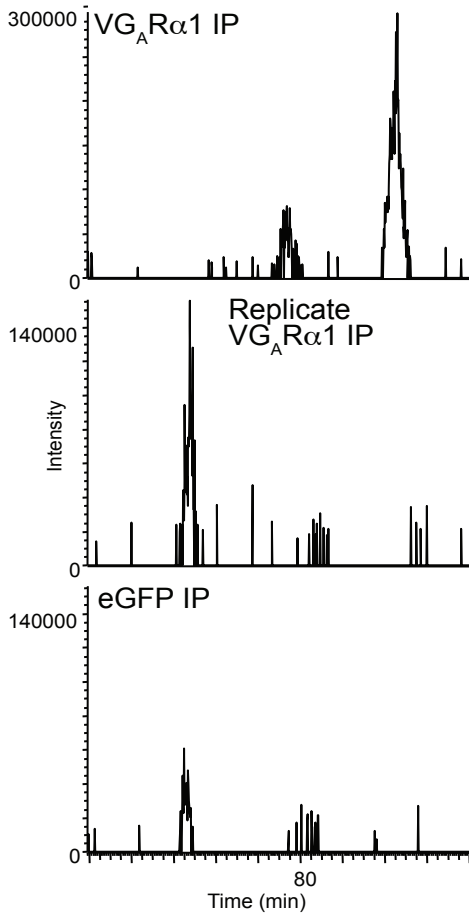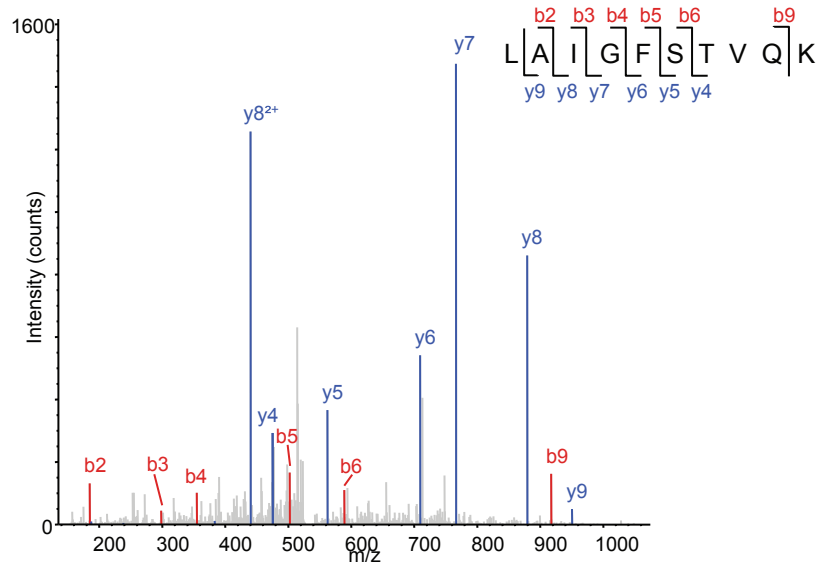

**N GABA<sub>A</sub>R $\gamma$ 1 peptide 4**

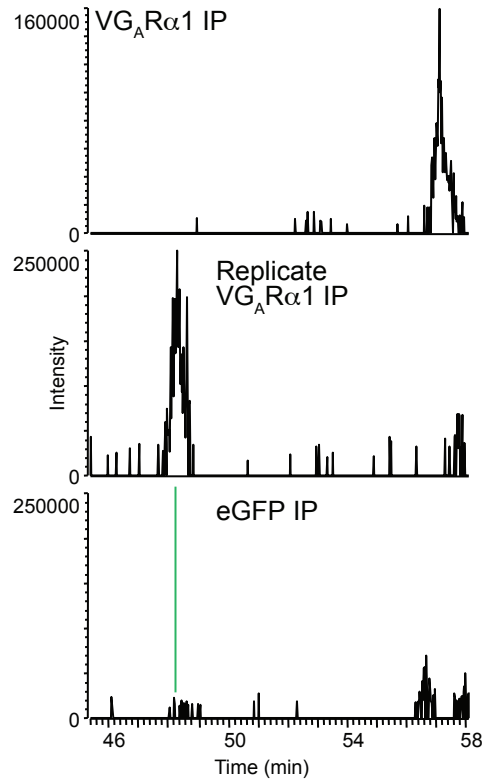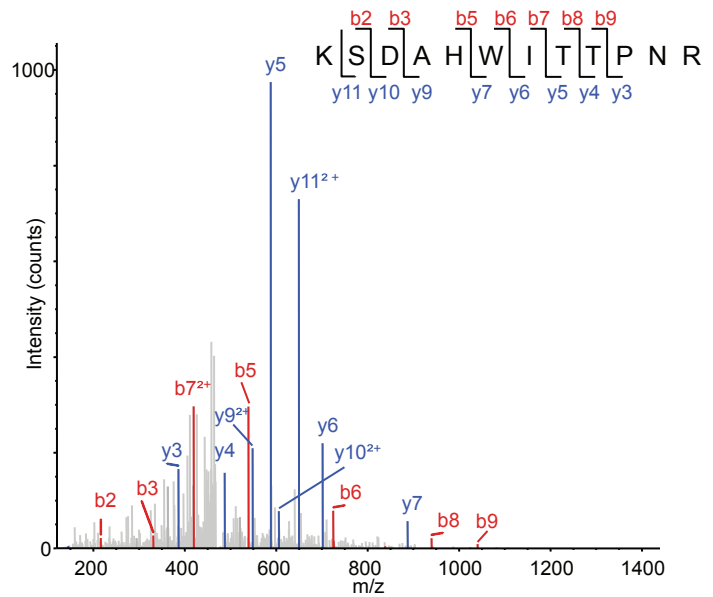

**O Lhfpl4 peptide 2**

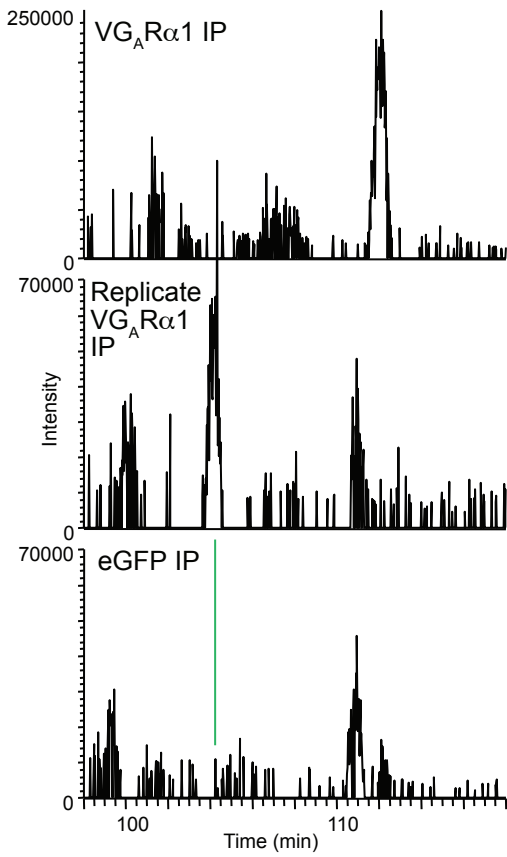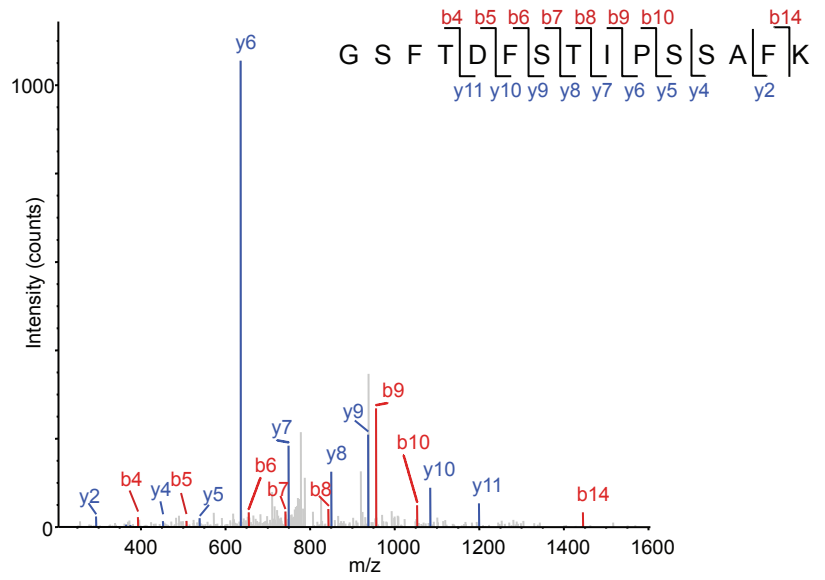

**P GABA<sub>A</sub> Rδ peptide 2**

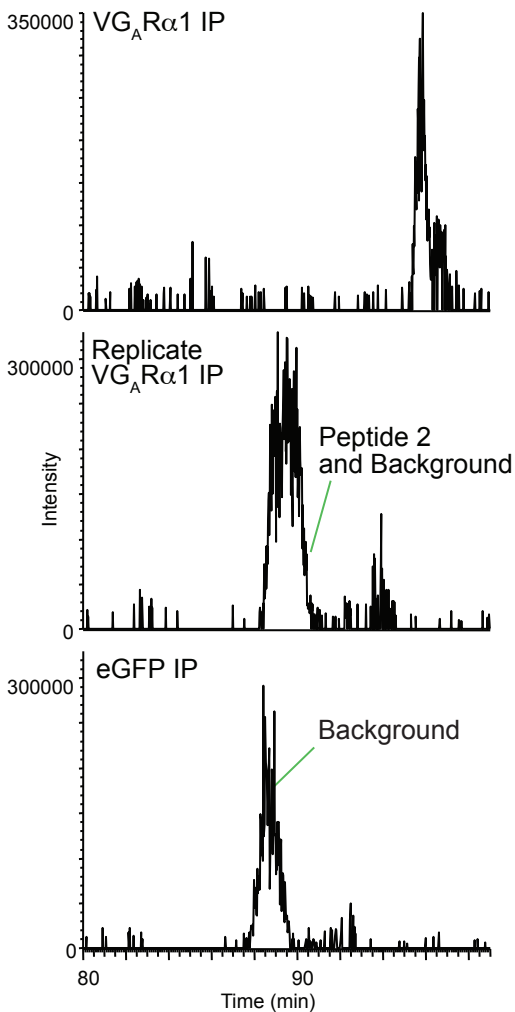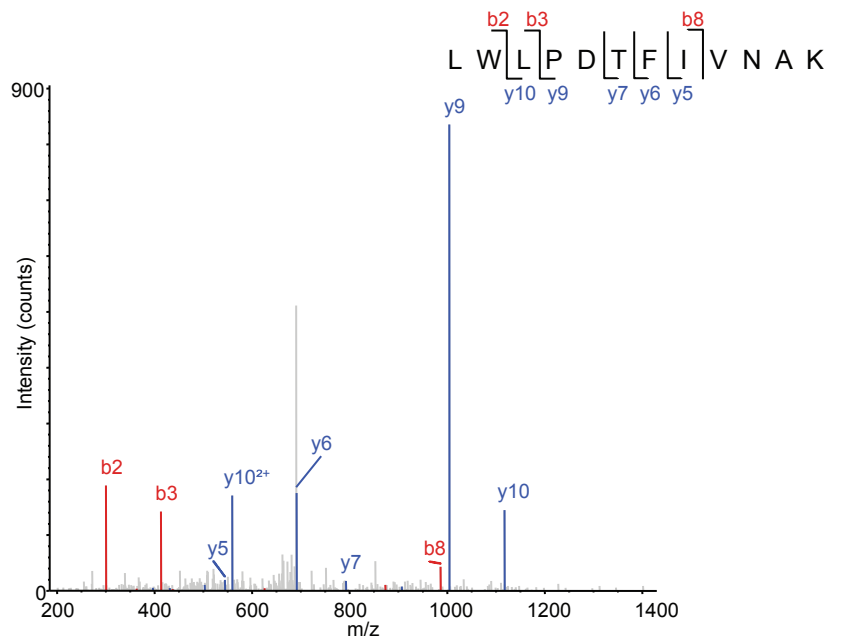

# Q Collybistin peptide 1

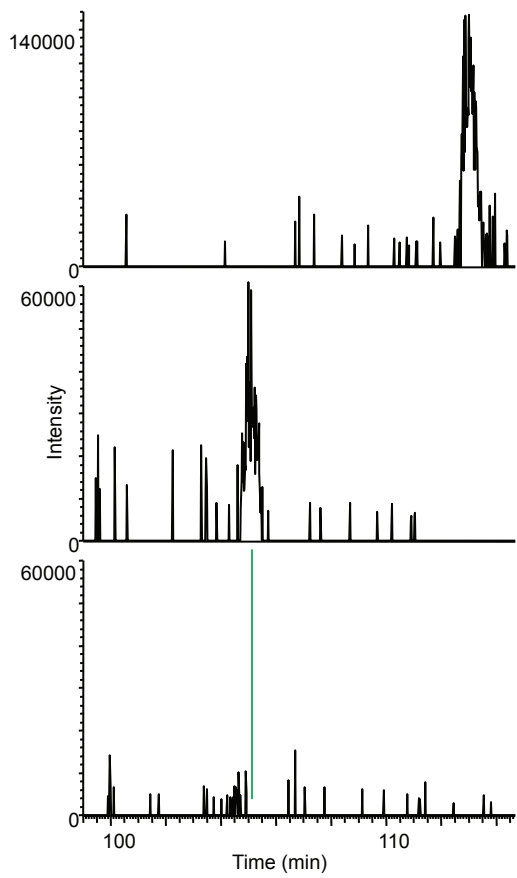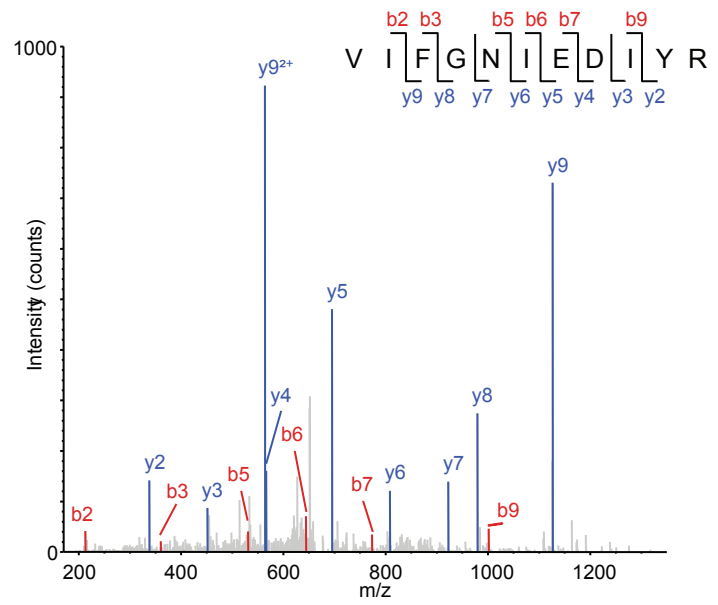

Supplement: pone.0039572.s002.pdf [file pone.0039572.s002.pdf]
