# Supplementary material for: The Biochemical Anatomy of Cortical Inhibitory Synapses
Source: PubMed Central journal article supplement (PMC3387162; doi:10.1371/journal.pone.0039572), 2012-06-29
Supplement: pone.0039572.s003.pdf [file pone.0039572.s003.pdf]

**Table S1: Summary of experimental evidences of identified peptides.**

| (A) Protein name & Ensembl ID                                                                                         | (B) Peptide sequence           | (C) Mr   | (D) Error | (E) Z | (F) m/z | (G) VG <sub>A</sub> R $\alpha$ 1 Data 1 | (H) VG <sub>A</sub> R $\alpha$ 1 Data 2 | (H) GFP Data 2 |
|-----------------------------------------------------------------------------------------------------------------------|--------------------------------|----------|-----------|-------|---------|-----------------------------------------|-----------------------------------------|----------------|
| GABA <sub>A</sub> R $\beta$ 2<br>ENSMUSP0000007797<br>(GABA <sub>A</sub> R $\beta$ 1, GABA <sub>A</sub> R $\beta$ 3)  | 25-QSVNDPSNMSLVK-37            | 1400.670 | 0.01      | 2     | 701.343 | MS/MS                                   | MS/MS                                   | -              |
|                                                                                                                       | 111-VADQLWVPDITYFLNDK-126 (*)  | 1922.952 | 0.011     | 2     | 962.484 | MS/MS                                   | MS/MS                                   | -              |
|                                                                                                                       | 111-VADQLWVPDITYFLNDKK-127 (*) | 2051.048 | 0.012     | 3     | 684.691 | MS/MS                                   | MS/MS                                   | -              |
|                                                                                                                       | 128-SFVHGVTVK-136 (*)          | 972.543  | 0.004     | 2     | 487.279 | MS/MS                                   | MS                                      | -              |
|                                                                                                                       | 142-LHPDGTVLYGLR-153 (*)       | 1339.732 | 0.008     | 3     | 447.585 | MS/MS                                   | MS/MS                                   | -              |
|                                                                                                                       | 154-ITTTAACMMDLR-165 (*)       | 1382.643 | 0.008     | 2     | 692.330 | MS/MS                                   | MS/MS                                   | -              |
|                                                                                                                       | 182-GYTTDDIEFYWR-193 (*)       | 1564.689 | 0.006     | 2     | 783.352 | MS/MS                                   | -                                       | -              |
|                                                                                                                       | 184-TTDDIEFYWR-193 (*)         | 1344.598 | 0         | 2     | 673.307 | MS/MS                                   | -                                       | -              |
|                                                                                                                       | <b>194-GDDNAVTVTK-204</b>      | 1075.519 | 0.005     | 2     | 538.767 | MS/MS                                   | MS/MS                                   | -              |
|                                                                                                                       | 205-IELPQFSIVDYK-216 (*)       | 1450.780 | 0.009     | 2     | 726.398 | MS/MS                                   | MS/MS                                   | MS             |
|                                                                                                                       | 222-VVFSTGSYPR-231             | 1111.572 | 0.007     | 2     | 556.794 | MS/MS                                   | MS/MS                                   | -              |
|                                                                                                                       | 360-MDPHENILLSTLEIK-374        | 1767.917 | 0.01      | 3     | 590.314 | MS/MS                                   | MS/MS                                   | -              |
|                                                                                                                       | 375-NEMATSEAVMGLGDPR-390       | 1676.762 | 0.013     | 2     | 839.389 | MS/MS                                   | MS/MS                                   | -              |
|                                                                                                                       | 391-STMLAYDASSIQYR-404         | 1620.755 | 0.01      | 2     | 811.385 | MS/MS                                   | MS/MS                                   | -              |
|                                                                                                                       | 438-ITIPDLTDVNAIDR-451         | 1554.834 | 0.01      | 2     | 778.425 | MS/MS                                   | MS/MS                                   | MS             |
| GABA <sub>A</sub> R $\beta$ 1<br>ENSMUSP00000031122<br>(GABA <sub>A</sub> R $\beta$ 2, GABA <sub>A</sub> R $\beta$ 3) | <b>52-LRPDFGGPPVDVGM-66</b>    | 1627.823 | 0.01      | 3     | 543.616 | MS/MS                                   | MS/MS                                   | -              |
|                                                                                                                       | 112-VADQLWVPDITYFLNDK-127 (*)  | 1922.952 | 0.011     | 2     | 962.484 | MS/MS                                   | MS/MS                                   | -              |
|                                                                                                                       | 112-VADQLWVPDITYFLNDKK-128 (*) | 1922.952 | 0.012     | 3     | 641.992 | MS/MS                                   | MS/MS                                   | -              |
|                                                                                                                       | 129-SFVHGVTVK-137 (*)          | 972.543  | 0.004     | 2     | 487.279 | MS/MS                                   | MS                                      | -              |
|                                                                                                                       | 143-LHPDGTVLYG LR-154 (*)      | 1339.732 | 0.008     | 3     | 447.585 | MS/MS                                   | MS/MS                                   | -              |
|                                                                                                                       | 155-ITTTAACMMDLR-166 (*)       | 1382.643 | 0.008     | 2     | 692.330 | MS/MS                                   | MS/MS                                   | -              |
|                                                                                                                       | 206-IELPQFSIVDYK-217 (*)       | 1450.780 | 0.009     | 2     | 726.398 | MS/MS                                   | MS/MS                                   | MS             |
|                                                                                                                       | 222-KVEFTTGAYPR-232            | 1267.660 | 0.004     | 2     | 634.838 | MS/MS                                   | MS                                      | -              |
|                                                                                                                       | 359-VQVDAHGNILLSTLEIR-375      | 1877.042 | 0.006     | 2     | 939.529 | MS/MS                                   | -                                       | -              |
|                                                                                                                       | 375-NETSGSEVLTGVSDPK-391       | 1618.778 | 0.01      | 2     | 810.397 | MS/MS                                   | MS/MS                                   | -              |
|                                                                                                                       | 392-ATMYSYDSASIQYR-405         | 1670.736 | 0.012     | 2     | 836.376 | MS/MS                                   | MS/MS                                   | -              |
|                                                                                                                       | 396-SYDSASIQYR-405             | 1188.552 | 0.012     | 2     | 595.284 | MS/MS                                   | MS/MS                                   | -              |
|                                                                                                                       | 438-VKIPDLTDVNSIDK-451         | 1555.852 | 0.007     | 3     | 519.625 | MS/MS                                   | MS/MS                                   | -              |
|                                                                                                                       | 440-IPDLTDVNSIDKWSR-454        | 1757.904 | 0.01      | 3     | 586.976 | MS/MS                                   | MS/MS                                   | -              |
|                                                                                                                       | 440-IPDLTDVNSIDK-451           | 1328.693 | 0.011     | 2     | 665.354 | MS/MS                                   | MS                                      | MS             |
| GABA <sub>A</sub> R $\beta$ 3<br>ENSMUSP00000038051<br>(GABA <sub>A</sub> R $\beta$ 1, GABA <sub>A</sub> R $\beta$ 2) | 26-QSVNDPGNMSFVK-38            | 1404.640 | 0.006     | 2     | 703.328 | MS/MS                                   | MS/MS                                   | -              |
|                                                                                                                       | 112-VADQLWVPDITYFLNDK-127 (*)  | 1922.952 | 0.011     | 2     | 962.484 | MS/MS                                   | MS/MS                                   | -              |
|                                                                                                                       | 112-VADQLWVPDITYFLNDKK-128 (*) | 2051.048 | 0.012     | 3     | 684.691 | MS/MS                                   | MS/MS                                   | -              |
|                                                                                                                       | 129-SFVHGVTVK-137 (*)          | 972.543  | 0.004     | 2     | 487.279 | MS/MS                                   | MS                                      | -              |
|                                                                                                                       | 143-LHPDGTVLYGLR-154 (*)       | 1339.732 | 0.008     | 3     | 447.585 | MS/MS                                   | MS/MS                                   | -              |
|                                                                                                                       | 155-ITTTAACMMDLR-166 (*)       | 1382.643 | 0.008     | 2     | 692.330 | MS/MS                                   | MS/MS                                   | -              |

|                                                                                                                                                                                             |                                   |          |       |   |         |       |       |    |
|---------------------------------------------------------------------------------------------------------------------------------------------------------------------------------------------|-----------------------------------|----------|-------|---|---------|-------|-------|----|
|                                                                                                                                                                                             | 183-GYTDDIEFYWR-194 (*)           | 1564.689 | 0.006 | 2 | 783.352 | MS/MS | -     | -  |
|                                                                                                                                                                                             | 185-TTDDIEFYWR-194 (*)            | 1344.598 | 0     | 2 | 673.307 | MS/MS | -     | -  |
|                                                                                                                                                                                             | 206-IELPQFSIVEHR-217              | 1466.795 | 0.007 | 2 | 734.405 | MS/MS | MS    | -  |
|                                                                                                                                                                                             | 222-NVVFATGAYPR-232               | 1193.626 | 0.008 | 2 | 597.821 | MS/MS | MS/MS | -  |
|                                                                                                                                                                                             | 390-NSAISFDNSGIQYR-403            | 1570.750 | 0.013 | 2 | 786.383 | MS/MS | MS/MS | -  |
|                                                                                                                                                                                             | <b>437-IKIPDLTDVNAIDR-450</b>     | 1581.881 | 0.009 | 3 | 528.302 | MS/MS | MS/MS | -  |
| Neuroigin-2<br>ENSMUSP00000053097<br>(Neuroigin-1)                                                                                                                                          | 17-GGGGPGGGAPGGPGLGLGSLGEER-40    | 1961.965 | 0.01  | 2 | 981.990 | MS/MS | MS/MS | -  |
|                                                                                                                                                                                             | 57-ELNNEILGPVVQF-69               | 1470.783 | 0.012 | 2 | 736.399 | MS/MS | MS    | -  |
|                                                                                                                                                                                             | 84-FQPPEAPASWPGVR-97              | 1537.778 | 0.011 | 3 | 513.601 | MS/MS | MS/MS | -  |
|                                                                                                                                                                                             | 160-DEATLNPPDTPDIR-172            | 1455.692 | 0.008 | 2 | 728.854 | MS/MS | MS    | -  |
|                                                                                                                                                                                             | 231-GNYGLLDQIQALR-243 (*)         | 1459.787 | 0.009 | 2 | 730.901 | MS/MS | MS/MS | -  |
|                                                                                                                                                                                             | 244-WLSENIAHFGGDPER-258           | 1726.818 | 0.012 | 2 | 864.417 | MS/MS | -     | -  |
|                                                                                                                                                                                             | 315-VGCDREDSTEAVECLR-330          | 1894.826 | 0.012 | 2 | 948.421 | MS/MS | MS    | -  |
|                                                                                                                                                                                             | 433-FMYTDWADR-441 (*)             | 1203.507 | 0.006 | 2 | 602.761 | MS/MS | MS    | -  |
|                                                                                                                                                                                             | 450-TLLALFTDHQWVAPAVATAK-469      | 2152.176 | 0.009 | 3 | 718.400 | MS/MS | -     | -  |
|                                                                                                                                                                                             | 470-LHADYQSPVYFYTFY-484           | 1912.868 | 0.002 | 2 | 957.442 | MS/MS | -     | -  |
|                                                                                                                                                                                             | <b>544-TGDPNQVPQDTK-556</b>       | 1395.668 | 0.005 | 2 | 698.842 | MS/MS | MS/MS | -  |
|                                                                                                                                                                                             | 557-FIHTKPNR-564                  | 1011.565 | 0.004 | 3 | 338.196 | MS/MS | -     | -  |
|                                                                                                                                                                                             | 565-FEEVWSK-572                   | 1022.515 | 0.008 | 2 | 512.265 | MS/MS | MS/MS | -  |
|                                                                                                                                                                                             | 736-ELPPEEELVSLQLK-749            | 1622.887 | 0.011 | 2 | 812.451 | MS/MS | MS/MS | -  |
|                                                                                                                                                                                             | 751-GGGVGADPAEALRPACPPDYTLALR-775 | 2523.267 | 0.014 | 3 | 842.097 | MS/MS | MS    | -  |
| GABA <sub>A</sub> R $\alpha$ 1<br>ENSMUSP00000020707<br>(GABA <sub>A</sub> R $\alpha$ 2, GABA <sub>A</sub> R $\alpha$ 3,<br>GABA <sub>A</sub> R $\alpha$ 4, GABA <sub>A</sub> R $\alpha$ 5) | 56-LRPGLGER-63 (*)                | 896.524  | 0.005 | 2 | 449.270 | MS/MS | MS/MS | -  |
|                                                                                                                                                                                             | 120-IWTPDTFFHNGK-131 (*)          | 1461.716 | 0.013 | 2 | 731.866 | MS/MS | MS/MS | -  |
|                                                                                                                                                                                             | 147-ITEDGTLTYTMR-158              | 1411.709 | 0.008 | 2 | 706.863 | MS/MS | MS/MS | -  |
|                                                                                                                                                                                             | 163-AECPMHLEDFPMDAHACPLK-182      | 2400.022 | 0.022 | 3 | 801.015 | MS/MS | MS    | -  |
|                                                                                                                                                                                             | 163-AECPMHLEDFPMDAH-177 (*)       | 1798.718 | 0.007 | 3 | 600.580 | MS/MS | MS    | -  |
|                                                                                                                                                                                             | 191-AEVVYEWTR-199                 | 1151.567 | 0.006 | 2 | 576.791 | MS/MS | MS/MS | MS |
|                                                                                                                                                                                             | 204-SVVVAEDGSR-213 (*)            | 1017.513 | 0.004 | 2 | 509.764 | MS/MS | MS/MS | -  |
|                                                                                                                                                                                             | 339-RGYAWDGK-346                  | 951.460  | 0.005 | 2 | 476.738 | MS/MS | MS/MS | -  |
|                                                                                                                                                                                             | <b>340-GYAWDGK-346</b>            | 795.359  | 0.004 | 2 | 398.687 | MS/MS | MS/MS | -  |
|                                                                                                                                                                                             | 363-KNNTYAPTATSYPNLAR-380         | 1982.978 | 0.008 | 3 | 662.000 | MS/MS | MS/MS | -  |
|                                                                                                                                                                                             | 363-KNNTYAPTATSYPN-377            | 1641.771 | 0.008 | 2 | 821.894 | MS/MS | MS/MS | -  |
|                                                                                                                                                                                             | 364-NNTYAPTATSYPNLAR-380          | 1854.888 | 0.014 | 2 | 928.452 | MS/MS | MS/MS | -  |
|                                                                                                                                                                                             | 398-EVKPETKPPEPK-409              | 1377.755 | 0.005 | 2 | 689.885 | MS/MS | MS/MS | -  |
| Gephyrin<br>ENSMUSP00000054064                                                                                                                                                              | 2-ATEGMILTNDHQIR-16               | 1792.863 | 0.011 | 3 | 598.629 | MS/MS | MS    | -  |
|                                                                                                                                                                                             | 41-DLVQDPSLLGGTISAYK-57           | 1775.936 | 0.006 | 2 | 888.976 | MS/MS | MS/MS | MS |

|                                                                                                                                                                                                           |                                 |          |       |   |          |       |       |    |
|-----------------------------------------------------------------------------------------------------------------------------------------------------------------------------------------------------------|---------------------------------|----------|-------|---|----------|-------|-------|----|
|                                                                                                                                                                                                           | 78-ELNLILTGGTGFAPR-93           | 1658.912 | 0.014 | 2 | 830.464  | MS/MS | MS    | -  |
|                                                                                                                                                                                                           | 139-TLIINLPGSK-148              | 1054.643 | 0.005 | 2 | 528.330  | MS/MS | MS/MS | MS |
|                                                                                                                                                                                                           | 244-IPDSIISR-251                | 899.513  | 0.006 | 2 | 450.764  | MS/MS | MS/MS | MS |
|                                                                                                                                                                                                           | 279-LSTASCPTPK-288              | 1060.527 | 0.005 | 2 | 531.271  | MS/MS | MS/MS | -  |
|                                                                                                                                                                                                           | 335-ASHSAVDITK-344              | 1027.536 | 0.007 | 3 | 343.520  | MS/MS | MS    | -  |
|                                                                                                                                                                                                           | 351-MSPFPLTSMKD-361             | 1268.589 | 0.012 | 2 | 635.302  | MS/MS | -     | -  |
|                                                                                                                                                                                                           | 387-VLAQDVYAK-395               | 1005.554 | 0.005 | 2 | 503.785  | MS/MS | MS    | -  |
|                                                                                                                                                                                                           | 396-DNLPPFPASVK-406             | 1183.630 | 0.007 | 2 | 592.823  | MS/MS | MS/MS | -  |
|                                                                                                                                                                                                           | 421-FIIGESQAGEQPTQTVMPGQVMR-443 | 2503.227 | 0.007 | 3 | 835.417  | MS/MS | -     | -  |
|                                                                                                                                                                                                           | <b>468-ESDDGTEELEVR-479</b>     | 1377.589 | 0     | 2 | 689.802  | MS/MS | MS/MS | -  |
| GABA <sub>A</sub> γ <sub>2</sub><br>ENSMUSP00000063812<br>(GABA <sub>A</sub> γ <sub>1</sub> )                                                                                                             | 60-VPEGDVTVILNNLLEGYDNK-79      | 2201.132 | 0.011 | 2 | 1101.574 | MS/MS | -     | -  |
|                                                                                                                                                                                                           | 80-LRPDIGVK-87                  | 896.551  | 0.007 | 2 | 449.283  | MS/MS | MS    | -  |
|                                                                                                                                                                                                           | 144-IWIPDTFFR-152 (*)           | 1193.630 | 0.006 | 2 | 597.823  | MS/MS | MSMS  | -  |
|                                                                                                                                                                                                           | 156-KADAHWITTPNR-167            | 1408.729 | 0.008 | 3 | 470.584  | MS/MS | MS/MS | MS |
|                                                                                                                                                                                                           | 202-SCPLEFSSYGYPR-214           | 1561.696 | 0.01  | 2 | 781.856  | MS/MS | MS    | -  |
|                                                                                                                                                                                                           | 208-SSYGYPR-214                 | 828.378  | 0.002 | 2 | 415.197  | MS/MS | MS    | -  |
|                                                                                                                                                                                                           | 224-SSVEVGDTR-232               | 948.455  | 0.005 | 2 | 475.236  | MS/MS | MS/MS | -  |
|                                                                                                                                                                                                           | 236-LYQFSFVGLR-245              | 1228.665 | 0.005 | 2 | 615.340  | MS/MS | MS/MS | -  |
|                                                                                                                                                                                                           | 393-SATIQMNNATHLQER-407         | 1712.832 | 0.006 | 2 | 857.424  | MS/MS | MS    | -  |
|                                                                                                                                                                                                           | <b>408-DEEYGYECLDGK-419</b>     | 1476.581 | 0.01  | 2 | 739.298  | MS/MS | MS/MS | -  |
| GABA <sub>A</sub> α <sub>3</sub><br>ENSMUSP00000062638<br>(GABA <sub>A</sub> α <sub>1</sub> , GABA <sub>A</sub> α <sub>2</sub> ,<br>GABA <sub>A</sub> α <sub>4</sub> , GABA <sub>A</sub> α <sub>5</sub> ) | <b>34-RQEPGDFVK-42</b>          | 1074.551 | 0.006 | 2 | 538.283  | MS    | MS/MS | -  |
|                                                                                                                                                                                                           | 146-IWTPDTFFHNGK-157 (*)        | 1461.703 | 0.013 | 2 | 731.859  | MS/MS | MS/MS | -  |
|                                                                                                                                                                                                           | 240-LNQYDLLGHVVGTEIIR-256       | 1939.052 | 0.017 | 3 | 647.359  | MS/MS | -     | -  |
|                                                                                                                                                                                                           | 409-DTEFSTISK-417               | 1026.486 | 0.011 | 2 | 514.251  | MS/MS | MS    | -  |
|                                                                                                                                                                                                           | 418-SAAAPSASSTPTAIASPK-435      | 1613.825 | 0.014 | 2 | 807.920  | MS/MS | MS    | MS |
|                                                                                                                                                                                                           | 436-ATYVQDSPAETK-447            | 1308.619 | 0.01  | 2 | 655.317  | MS/MS | MS    | -  |
| Neuroigin-3<br>ENSMUSP00000066304<br>(Neuroigin-2)                                                                                                                                                        | 231-GNYGLLDQIQALR-243 (*)       | 1459.787 | 0.009 | 2 | 730.901  | MS/MS | MS/MS | -  |
|                                                                                                                                                                                                           | 315-VGCNVLDTVDMVDCLR-330        | 1864.857 | 0.009 | 2 | 933.436  | MS/MS | -     | -  |
|                                                                                                                                                                                                           | 433-FMYTDWADR-441 (*)           | 1203.507 | 0.006 | 2 | 602.761  | MS/MS | MS    | -  |
|                                                                                                                                                                                                           | 544-TGDPNKPVPQDTK-556           | 1395.705 | 0.007 | 3 | 466.243  | MS/MS | MS    | -  |
|                                                                                                                                                                                                           | <b>763-LTALPDYTLTLR-774</b>     | 1375.780 | 0.009 | 2 | 688.898  | MS/MS | MS/MS | MS |
| Neurobeachin<br>ENSMUSP00000029374                                                                                                                                                                        | 559-AVLEQFLSFAK-569             | 1251.697 | 0.011 | 2 | 626.856  | MS/MS | -     | -  |
|                                                                                                                                                                                                           | 1293-VDLGFR-1298                | 705.383  | 0.002 | 2 | 353.699  | MS/MS | MS    | -  |
|                                                                                                                                                                                                           | 1891-EIFVDFAPFLSR-1902          | 1439.755 | 0.011 | 2 | 720.885  | MS/MS | -     | -  |
|                                                                                                                                                                                                           | 1945-NAGLAFIELINEGR-1958        | 1515.818 | 0.014 | 2 | 758.917  | MS/MS | -     | -  |
|                                                                                                                                                                                                           | <b>2087-SAVEYGTEDVVK-2099</b>   | 1424.678 | 0.012 | 2 | 713.347  | MS/MS | MS    | -  |
|                                                                                                                                                                                                           | 2247-VGVGTSYGLPQAR-2259         | 1303.688 | 0.008 | 2 | 652.852  | MS/MS | MS    | -  |
| GABA <sub>A</sub> α <sub>2</sub><br>ENSMUSP00000000572<br>(GABA <sub>A</sub> α <sub>1</sub> , GABA <sub>A</sub> α <sub>3</sub> ,                                                                          | 121-IWTPDTFFHNGK-132 (*)        | 1461.703 | 0.013 | 2 | 731.859  | MS/MS | MS/MS | -  |
|                                                                                                                                                                                                           | 148-IQDDGTLTYTMR-159            | 1424.705 | 0.009 | 2 | 713.360  | MS/MS | MS/MS | -  |
|                                                                                                                                                                                                           | 164-AECPMHLEDFPMDAH-178 (*)     | 1798.718 | 0.007 | 3 | 600.580  | MS/MS | MS    | -  |
|                                                                                                                                                                                                           | <b>215-LNQYDLLGQSIGK-227</b>    | 1447.777 | 0.011 | 2 | 724.896  | MS/MS | MS/MS | -  |

|                                                                                                                                                                                             |                                                  |          |       |   |              |       |       |    |
|---------------------------------------------------------------------------------------------------------------------------------------------------------------------------------------------|--------------------------------------------------|----------|-------|---|--------------|-------|-------|----|
| GABA <sub>A</sub> R $\alpha$ 4, GABA <sub>A</sub> R $\alpha$ 5)                                                                                                                             | 390-SATTPEPNKKPENKPAAEK-408                      | 2036.073 | 0.02  | 3 | 679.699      | MS/MS | MS    | -  |
| GABA <sub>A</sub> R $\alpha$ 4<br>ENSMUSP00000031121<br>(GABA <sub>A</sub> R $\alpha$ 1, GABA <sub>A</sub> R $\alpha$ 2,<br>GABA <sub>A</sub> R $\alpha$ 3, GABA <sub>A</sub> R $\alpha$ 5) | <b>51-ILDSLLDGYDNR-62</b>                        | 1392.698 | 0.01  | 2 | 697.357      | MS/MS | MS/MS | -  |
|                                                                                                                                                                                             | 190-FGSYAYPK-197                                 | 931.444  | 0.001 | 2 | 466.730      | MS/MS | MS    | -  |
|                                                                                                                                                                                             | 355-ISKPPPEVPAAPVLK-369                          | 1541.930 | 0.013 | 3 | 514.985      | MS/MS | MS    | -  |
|                                                                                                                                                                                             | 390-TNALVHSESDVK-401                             | 1298.657 | 0.011 | 2 | 650.336      | MS/MS | MS    | -  |
|                                                                                                                                                                                             | 413-TSAVQESSEATPK-425                            | 1333.640 | 0.005 | 2 | 667.828      | MS/MS | MS    | -  |
| GABA <sub>A</sub> R $\alpha$ 5<br>ENSMUSP00000063276<br>(GABA <sub>A</sub> R $\alpha$ 1, GABA <sub>A</sub> R $\alpha$ 2,<br>GABA <sub>A</sub> R $\alpha$ 3, GABA <sub>A</sub> R $\alpha$ 4) | <b>52-ILDGLLDGYDNR-63</b>                        | 1362.686 | 0.008 | 2 | 682.351      | MS    | MS/MS | -  |
|                                                                                                                                                                                             | 64-LRPGLGER-71 (*)                               | 896.524  | 0.005 | 2 | 449.270      | MS/MS | MS/MS | -  |
|                                                                                                                                                                                             | 128-IWTPDTFFHNGK-139 (*)                         | 1461.716 | 0.013 | 2 | 731.866      | MS/MS | MS/MS | -  |
|                                                                                                                                                                                             | 212-SVVVAEDGSR-221 (*)                           | 1017.513 | 0.004 | 2 | 509.764      | MS/MS | MS/MS | -  |
|                                                                                                                                                                                             | 392-EQPPAGTANAPT/VSİK-407                        | 1579.827 | 0.007 | 2 | 790.921      | MS/MS | MS    | -  |
| Neurexin 1<br>ENSMUSP00000057294                                                                                                                                                            | 173-TGSISDFR-181                                 | 1028.499 | 0.007 | 2 | 515.257      | MS/MS | -     | -  |
|                                                                                                                                                                                             | <b>824-LAIGFSTVQK-833</b>                        | 1062.614 | 0.007 | 2 | 532.315      | MS/MS | MS    | MS |
|                                                                                                                                                                                             | 1084-EPYPGSAEVIR-1094                            | 1216.616 | 0.008 | 2 | 609.316      | MS/MS | -     | -  |
|                                                                                                                                                                                             | 1126-NRDEGSYHVDESR-1138                          | 1562.679 | 0.008 | 3 | 521.901      | MS/MS | -     | -  |
| GABA <sub>A</sub> R $\gamma$ 1<br>ENSMUSP00000031119<br>(GABA <sub>A</sub> R $\gamma$ 2 )                                                                                                   | 59-IHEGDITQILNSLLQGYDNK-78                       | 2270.164 | 0.01  | 3 | 757.729      | MS/MS | -     | -  |
|                                                                                                                                                                                             | 79-LRPDIGVR-86                                   | 924.556  | 0.006 | 3 | 309.193      | MS/MS | MS    | -  |
|                                                                                                                                                                                             | 143-IWIPDTFFR-151 (*)                            | 1193.630 | 0.006 | 2 | 597.823      | MS/MS | MSMS  | -  |
|                                                                                                                                                                                             | <b>155-KSDAHWITTPNR-166</b>                      | 1424.726 | 0.011 | 3 | 475.917      | MS/MS | MS    | -  |
|                                                                                                                                                                                             | 235-LYQFAFVGLR-244                               | 1212.665 | 0     | 2 | 607.340      | MS/MS | MS    | -  |
| Lipoma HMGIC fusion<br>partner-like 4 protein<br>ENSMUSP00000061172                                                                                                                         | 10-LYHEHYMR-17                                   | 1147.527 | 0.004 | 2 | 574.771      | MS/MS | MS    | MS |
|                                                                                                                                                                                             | <b>79-GSFTDFSTIP SSAFK -93</b>                   | 1590.764 | 0.01  | 2 | 796.390      | MS    | MSMS  | -  |
|                                                                                                                                                                                             | 166-YSLGDCSVR-174                                | 1055.473 | 0.003 | 2 | 528.744      | MS/MS | MS    | -  |
|                                                                                                                                                                                             | 201-QTDLLQEELK-210                               | 1215.640 | 0.006 | 2 | 608.828      | MS/MS | MS    | -  |
|                                                                                                                                                                                             | 215-<br>DFVGTTVSSVLRPGGDVSGWGVLPVVAH<br>TQGP-247 | 3348.676 | 0.021 | 3 | 1117.23<br>3 | MS/MS | -     | -  |
| GABA <sub>A</sub> R $\delta$<br>ENSMUSP00000030925                                                                                                                                          | 119-LWLPDTFIVNAK-130                             | 1415.789 | 0.007 | 2 | 708.902      | MS/MS | -     | -  |
|                                                                                                                                                                                             | <b>416-LKPIDADTIDIYAR-429</b>                    | 1602.870 | 0.009 | 3 | 535.297      | MS/MS | MS    | -  |
| Collybistin<br>ENSMUSP00000085403                                                                                                                                                           | <b>154-VIFGNIEDIYR-164</b>                       | 1337.709 | 0.012 | 2 | 669.862      | MS/MS | MS    | -  |
